# Supplementary material for: Heart Rate in Patients with SARS-CoV-2 Infection: Prevalence of High Values at Discharge and Relationship with Disease Severity
Source: MDPI journal article supplement (doi:10.3390/jcm10235590), 2021-11-28
Supplement: s1 [file s1]

**Table S1.** COVID-19 related treatments and their association with heart rate at discharge in hospitalized patients with SARS-CoV-2 infection.

|                                      | Models Adjusted only by<br>Heart Rate at Admission |          | Fully Adjusted Model * |          |
|--------------------------------------|----------------------------------------------------|----------|------------------------|----------|
|                                      | Coefficient (95% CI)                               | <i>p</i> | Coefficient (95% CI)   | <i>p</i> |
| Tocilizumab vs no                    | 2.31 (−0.77;5.39)                                  | 0.142    | 2.15 (−0.90;5.20)      | 0.166    |
| Azithromycin vs no                   | −0.40 (−2.63;1.83)                                 | 0.727    | −0.26 (−2.57;2.06)     | 0.826    |
| Hydroxychloroquine-chloroquine vs no | −2.09 (−4.18;0.01)                                 | 0.051    | −2.29 (−4.77;0.19)     | 0.070    |
| Corticosteroids vs no                | 0.17 (−0.84;3.02)                                  | 0.268    | 0.97 (−0.97;2.92)      | 0.326    |

\* Intercept (std. error) = 98.860 (24.840), adjusted R<sup>2</sup> = 13.6%; adjusted by: Heart rate at admission, age, gender, Charlson Comorbidity Index, oxygen saturation, systolic blood pressure, body-temperature, hemoglobin, need for intensive care, COVID-19 pulmonary disease, drugs acting on heart rate.

**Table S2.** Logistic regression showing the association of predictors with sinus tachycardia (heart rate at discharge > 100 bpm) in hospitalized patients with SARS-CoV-2 infection.

|                                                  | OR (95% CI)         | P      |
|--------------------------------------------------|---------------------|--------|
| Heart rate at admission, per bpm increase        | 1.016 (0.995;1.038) | <0.001 |
| Age, per year increase                           | 0.972 (0.936;1.009) | 0.511  |
| Gender, female as reference                      | 1.549 (0.64;3.754)  | 0.935  |
| Charlson Comorbidity Index, per unit increase    | 1.073 (0.856;1.345) | 0.195  |
| Oxygen saturation, %, per unit increase          | 0.961 (0.885;1.044) | 0.506  |
| Systolic blood pressure, per 1 mmHg increase     | 0.996 (0.979;1.014) | 0.640  |
| Body-temperature ° Celsius, per unit increase    | 1.182 (0.805;1.736) | 0.348  |
| Hemoglobin, per g/dL increase                    | 0.771 (0.619;0.961) | 0.023  |
| Severe disease, absence as reference             | 3.783 (1.539;9.299) | <0.001 |
| COVID-19 pulmonary disease, absence as reference | 1.263 (0.336;4.746) | 0.348  |
| Drugs acting on heart rate, absence as reference | 0.547 (0.205;1.457) | 0.097  |

COVID, CORonaVirus-related Disease; OR, Odds Ratio;
